# Supplementary material for: Blocking GM-CSF receptor α with mavrilimumab reduces infiltrating cells, pro-inflammatory markers and neoangiogenesis in ex vivo cultured arteries from patients with giant cell arteritis
Source: PubMed Central journal article supplement (PMC8921590; doi:10.1136/annrheumdis-2021-220873), 2022-01-19
Supplement: annrheumdis-2021-220873supp002.pdf [file annrheumdis-2021-220873supp002.pdf]

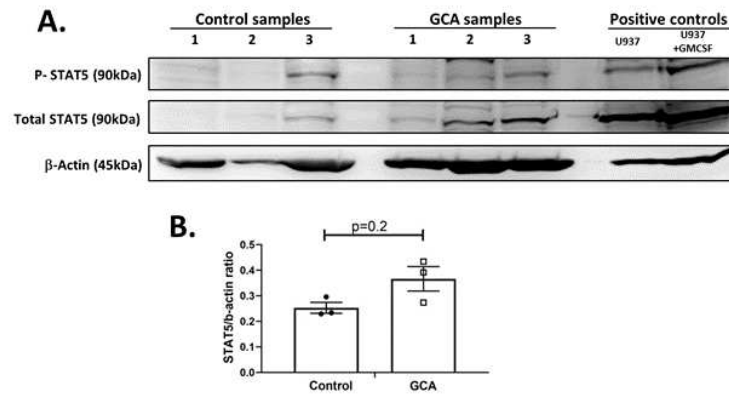

### Supplementary Figure S1: STAT5 activation in GCA lesions

Immunoblot (A) and its corresponding densitometric quantitation (B) of total STAT5 or STAT5 phosphorylated at the tyrosine 694 residue, in lysates of fresh temporal arteries from 3 controls and 3 GCA patients, with  $\beta$ -actin expression as control for loading. Lysates of U937 cell line with or without exposure to recombinant GM-CSF at 20 ng/ml were used as a positive control for STAT5 expression and phosphorylation.
