# Supplementary material for: Blocking GM-CSF receptor α with mavrilimumab reduces infiltrating cells, pro-inflammatory markers and neoangiogenesis in ex vivo cultured arteries from patients with giant cell arteritis
Source: PubMed Central journal article supplement (PMC8921590; doi:10.1136/annrheumdis-2021-220873), 2022-01-19
Supplement: annrheumdis-2021-220873supp003.pdf [file annrheumdis-2021-220873supp003.pdf]

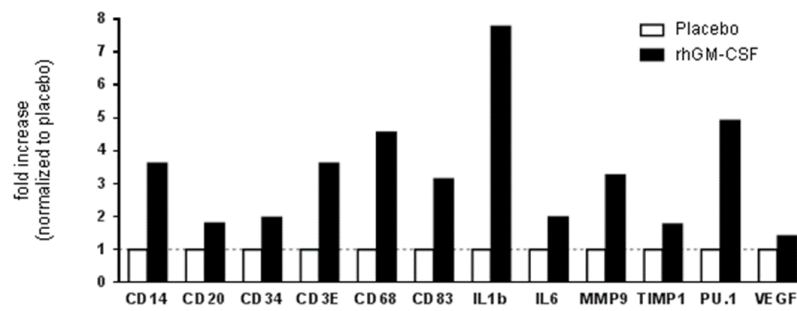

### Supplementary Figure S2: GM-CSF effect on GCA lesions

Transcript measurement of relevant pro-inflammatory cytokines and cell markers from a GCA positive temporal artery biopsy cultured in presence of placebo or recombinant human GM-CSF (rhGM-CSF) at 20ng/ml, given as fold increase, normalized to placebo.
